# Supplementary material for: Cross-kingdom synthetic microbiota supports tomato suppression of Fusarium wilt disease
Source: PubMed Central journal article supplement (PMC9780251; doi:10.1038/s41467-022-35452-6), 2022-12-22
Supplement: 41467_2022_35452_MOESM2_ESM.pdf [file 41467_2022_35452_MOESM2_ESM.pdf]

1 **Supplementary information**

2 **Cross-kingdom synthetic microbiota supports tomato suppression of *Fusarium* wilt**  
3 **disease**

4 Xin Zhou<sup>1,2</sup>, Jinting Wang<sup>1,2</sup>, Fang Liu<sup>1</sup>, Junmin Liang<sup>1</sup>, Peng Zhao<sup>1</sup>, Clement K.M. Tsui<sup>3,4,5</sup>,  
5 Lei Cai<sup>1,2\*</sup>

6

7 \*Correspondence to: cail@im.ac.cn

8

9 **Supplementary Methods**

10 **Microbial diversity, taxonomic and statistical analysis**

11 The fungal ITS1 region and bacterial 16S rRNA gene sequences were separately processed  
12 using USEARCH11 software and VSEARCH software, respectively<sup>70,71</sup>. In brief, the acquired  
13 16S rRNA and ITS1 sequences were quality-filtered and merged into a single sequence using  
14 USEARCH11 pipelines<sup>70</sup>. Bacterial and fungal chimeric sequences were detected and removed  
15 using the UCHIME algorithm in USEARCH11 against the Ribosomal Database Project (RDP)  
16 Gold database UNITE CHIME reference dataset<sup>72</sup>, respectively. Then, all nonchimeric  
17 sequences were sorted by abundance, dereplicated, and clustered to zOTUs using ‘unoise3’  
18 algorithm with default parameters in USEARCH11<sup>71</sup>. Bacterial and fungal zOTUs with reads  
19 fewer than 8 were removed, and their representative sequences were annotated to taxonomic  
20 categories using the ‘syntax’ and RDP Naive Bayesian Classifier algorithms within the SILVA  
21 138 database and UNITE database at a confidence threshold of 0.8, respectively<sup>69,70</sup>. All fungal  
22 and bacterial ZOTUs assigned only to a kingdom were removed to avoid an overestimation of  
23 microbial diversity. The rarefaction curves of bacterial and fungal samples were calculated  
24 with the ‘rarecurve’ function in vegan, respectively<sup>73</sup>. The rarefaction curves of fungal  
25 communities and bacterial communities by the observed zOTUs showed that most samples  
26 nearly approached an asymptote, indicating the sufficient of sequencing depth. Cumulative  
27 sum scaling (CSS) was used as a normalization algorithm for diversity analyses of bacterial  
28 and fungal communities, to allow the comparison on an equal basis. The alpha diversities were  
29 calculated based on the species richness index to estimate the bacterial and fungal species  
30 richness<sup>74</sup>. Bray-Curtis dissimilarity matrices between samples were calculated, visualized, and  
31 plotted using principal coordinate analysis (PCoA) or Principal Component Analysis to present

32 the dissimilarities among different samples. Permutational multivariate analysis of variance  
33 (PERMANOVA) statistical tests followed by Tukey Honest Significant Difference (HSD)  
34 method were implemented to determine the effects of different factors on the community  
35 dissimilarity using beta distance matrices (nested “adonis” in vegan R package)<sup>73</sup>. The  
36 differences in the community composition of different groups were also calculated using the  
37 analysis of similarities (ANOSIM) (nested “anosim” in vegan R package)<sup>73</sup>. The Kruskal–  
38 Wallis test and Tukey post hoc test when appropriate ( $P < 0.05$ ) were used for the comparison  
39 of field and greenhouse groups. Additionally, differential abundance analysis between NF and  
40 GH was calculated using the negative binomial generalized linear model in R package edgeR<sup>30</sup>.  
41 We used the trimmed mean of M-values (TMM) normalization method and a False Discovery  
42 Rate (FDR) corrected value of  $P < 0.05$ . Random Forest machine learning classification  
43 analysis was employed to acquire the best discriminant performance of biomarkers across NF  
44 and GH tomato plants using the randomForest package v.4.7–1<sup>80</sup>. The bacterial and fungal  
45 communities of tomato plants at different taxonomic levels (phylum, class, order, family, and  
46 genus) were calculated separately to obtain the best discriminating biomarkers with the highest  
47 classification accuracy<sup>25</sup>. For the prediction of different taxonomic levels, the randomForest  
48 (ntree = 1000, importance = TRUE, proximity = TRUE) function was employed to generate  
49 the classification model for NF and GH tomato plants. Cross-validation was performed using  
50 rfcv function (ten repeats) for selecting appropriate biomarkers, and the varImpPlot function  
51 was used to show the importance of biomarkers in the classification<sup>80</sup>.

## 52 **Co-occurrence network analysis and definition of keystone taxa of NF tomato**

53 The co-occurrence network analysis was performed using the bacterial and fungal zOTUs  
54 with relative abundance greater than 0.1%. The non-parametric Spearman correlation analysis  
55 were used to reconstruct the co-occurrence patterns and calculate the topological network  
56 properties<sup>75</sup>. The co-occurrence networks were regarded as robust if the Spearman’s correlation  
57 coefficient ( $\rho$ )  $> 0.70$  and the significant  $P$  value  $< 0.05$ . The  $P$  values were adjusted with the  
58 minimize false positive signals using Benjamini–Hochberg procedure<sup>76</sup>. The important  
59 network topological parameters including the number of edges, average path length, average  
60 degrees, number of vertices were calculated and visualized to compare the microbial networks  
61 differences of GH and NF tomato plants. The ecologically important keystone microbes  
62 frequently co-occur with other microbes in microbial networks and potentially play important  
63 roles in the microbial community<sup>77</sup>. We reveal the keystone microbes of NF tomato plants  
64 based on the differences in co-occurrence network interactions between GH- and NF-tomato  
65 microbiomes by employing the online platform NetShift (<https://web.rniapps.net/netshift>)<sup>33</sup>.

66 The NetShift analysis could find the significant overall change in microbial communities and  
67 associations of each node (taxon) in healthy and diseased groups. The keystone taxa could be  
68 determined based on the node size and NESH score. NESH score is a Neighbor Shift score that  
69 could quantify directional changes in the individual interactions, and each node represents a  
70 taxon. The size of each node represents their NESH score, and the red color node indicates its  
71 betweenness increases from healthy group to disease group. Thus, the big and red nodes  
72 indicate the potential keystone taxa<sup>33</sup>.

### 73 **Phylogenetic tree of most abundant fungal and bacterial zOTUs**

74 The most abundant fungal and bacterial zOTUs (relative abundance > 0.1%) were chosen,  
75 with 167 fungal and 266 bacterial zOTUs and associated representative sequences were used  
76 for the construction of maximum likelihood (ML) trees. The IQ-Tree software was used for the  
77 ML tree construction with the Best-fit model TIM3e+I+G4, following parameters 5000  
78 Ultrafast bootstrap and 1000 SH-like approximate likelihood ratio test<sup>78</sup>. The tree files were  
79 uploaded to the iTOL (<http://itol.embl.de>)<sup>79</sup> online and the phylogenetic trees were edited, and  
80 annotated with the heatmaps of the relative abundance of zOTUs in four different locations in  
81 the phylogenetic tree. The isolated bacterial and fungal strains which were classified into the  
82 same genera presented in the phylogenetic trees were added to the outer rings as pink dots,  
83 respectively.

### 84 **Metagenome quality filtering and annotation pipelines**

85 Twenty-four different tomato samples of different SynComs were chosen for metagenomic  
86 sequencing using the Illumina NovaSeq 6000 instrument (Majorbio Bio-pharm Technology,  
87 Shanghai, China). The entire data processing pipeline and scripts were made available at  
88 GitHub (<https://github.com/XinJason/Cross-kingdom-synthetic-microbiota>). The low-quality  
89 raw data were stripped, trimmed (length<50 bp or with a quality value <20 or having N bases)  
90 and removed by Trimmomatic<sup>81</sup>. To remove host (*Solanum lycopersicum*) sequences, Bowtie2  
91 v2.4.1<sup>82</sup> was used to build a host genome database. All reads aligned to the host genome and  
92 their mated reads were comprehensively removed using Bowtie2<sup>82</sup>. In total, 0.29% to 4.44%  
93 of the clean reads were removed. After removal of nonmicrobial sequences, the remaining  
94 sequences were taxonomically assigned using MetaPhlan2 with the “very sensitive” global  
95 alignment option. The relative abundance of gene ortholog groups and functional pathways  
96 were generated using HUMAnN2 v2.8.1 against the utility\_mapping, chocophlan, and uniref90  
97 databases, respectively<sup>83</sup>. The HUMAnN2 output tables were merged across all sample using  
98 humann2\_join\_tables scripts, and were normalized to counts per million (CPM) before

99 downstream application using `humann2_renorm_table` script. The comparison of each of the  
100 resulting pathways was conducted using the normalized abundance tables using one-way  
101 ANOVA test and Tukey HSD. The filtered reads were assembled to different contigs using  
102 MEGAHIT v1.2.9<sup>84</sup>; the gene catalogs were predicted and clustered over contigs by using  
103 Prokka and CD-HIT (v4.8.1) to generate a non-redundant gene catalog, respectively<sup>85</sup>. The  
104 functional annotations were performed by `eggNOG-mapper v0.13.1`<sup>86</sup> using DIAMOND  
105 software<sup>87</sup> and eggNOG databases<sup>88</sup>. The functional annotation results were reorganized into  
106 KEGG orthologs (KOs) profiles<sup>89</sup>, clusters of orthologous group of proteins categories (COG)  
107 <sup>90</sup>, and CAZymes<sup>91</sup>. The antibiotic resistance genes were reorganized and annotated using  
108 ResFams<sup>92</sup>. The KO abundance within each sample were normalized by the median universal  
109 single-copy gene abundance. The STAMP<sup>93</sup> and Linear discriminant analysis (LDA) effect size  
110 (LEfSe) software<sup>94</sup> were implemented to analyze statistically significant differential abundance  
111 of functional genes or pathways corresponding to different SynCom groups.

## 112 **RNA seq of tomato plants**

113 For the transcriptional analysis, the tomato leaves treated with different SynComs and *FOL*,  
114 were harvested separately in three biological replicates at 7 dpt. The total RNA extraction and  
115 reverse transcription methods followed the procedure described above. The sequencing  
116 libraries were constructed using the TruSeq Stranded Total RNA kit (Illumina, RS-122-2402)  
117 and sequenced using the Illumina NovaSeq 6000 instrument (Paired-end 2 × 150 bp) (Majorbio  
118 Bio-pharm Technology, Shanghai, China). Clean reads were obtained by filtering low-quality  
119 reads as well as reads containing poly-N sequences or adaptor sequences from raw data. The  
120 percentages of Q20 and Q30 reads was calculated from clean sequences using MultiQC v0.4<sup>95</sup>,  
121 and the remaining high-quality sequences were used for downstream analyses. The clean reads  
122 were mapped to the reference genome of tomato (*Solanum lycopersicum*, genome ID:  
123 GCF\_000188115.3\_SL2.50) using HISAT2 v2.2.0<sup>96</sup>, and the mapped sequences were aligned  
124 and sorted using SAMtools v1.3.1<sup>97</sup>. The gene expression levels of each sample were estimated  
125 as FPKM (fragments per kilobase of transcript per million fragments) mapped by the Salmon  
126 v0.8.2<sup>98</sup>. Differential expressions of transcripts in different tomato samples were calculated as  
127 log<sub>2</sub> fold-change (LFC) using the “DESeq2” package<sup>99</sup>. Differential expressions between  
128 different treatments were tested against the null hypothesis  $LFC < 2$  with Benjamini and  
129 Hochberg adjusted  $P < 0.05$ , respectively. To compare the gene ontology processes of tomato  
130 plants involved in different SynComs treatments, GO terms from using DESeq2 results of each  
131 of the groups were extracted with  $P > 0.05$  and  $-1 \leq \log_2 \text{fold-change} \leq 1$ . Based on genes  
132 significantly (FDR > 0.05) up-regulated in different synthetic microbiota treatments, we

133 estimated GO term enrichment for Biological Processes and Molecular Functions using  
134 GENEONTOLOGY online software (<http://geneontology.org/>). The enriched GO terms were  
135 visualized using the ImageGP platform<sup>100</sup>.

136

## 137 Reference

- 138 70. Rognes, T., Flouri, T., Nichols, B., Quince, C. & Mahé, F. VSEARCH: a versatile  
139 open source tool for metagenomics. *PeerJ* **4**, e2584 (2016).
- 140 71. Edgar, R. Taxonomy annotation and guide tree errors in 16S rRNA databases. *PeerJ*  
141 **6**, e5030 (2018).
- 142 72. Nilsson, R. H. et al. The UNITE database for molecular identification of fungi:  
143 handling dark taxa and parallel taxonomic classifications. *Nucleic Acids Res.* **47**,  
144 D259–D264 (2019).
- 145 73. Oksanen, J. et al. vegan: Community Ecology Package. (2016).
- 146 74. Jost, L. Entropy and Diversity. *Oikos* **113**, 363–375 (2006).
- 147 75. Gao, M. et al. Disease-induced changes in plant microbiome assembly and functional  
148 adaptation. *Microbiome* **9**, 187 (2021).
- 149 76. Benjamini, Y. & Hochberg, Y. Controlling the False Discovery Rate: A Practical and  
150 Powerful Approach to Multiple Testing. *Journal of the Royal Statistical Society:*  
151 *Series B (Methodological)* **57**, 289–300 (1995).
- 152 77. van der Heijden, M. G. A. & Hartmann, M. Networking in the Plant Microbiome.  
153 *Plos Biol.* 2016 (10.1371/journal.pbio.1002378).
- 154 78. Nguyen, L. T., Schmidt, H. A., von Haeseler, A. & Minh, B. Q. IQ-TREE: a fast and  
155 effective stochastic algorithm for estimating maximum-likelihood phylogenies. *Mol.*  
156 *Biol. Evol.* **32**, 268–274 (2015).
- 157 79. Letunic, I. & Bork, P. Interactive Tree Of Life (iTOL) v4: recent updates and new  
158 developments. *Nucleic Acids Res.* **47**, W256–W259 (2019).
- 159 80. Liaw, A. & Wiener, M. Classification and regression by randomForest. *R News* **2**, 18–  
160 22 (2002).
- 161 81. Bolger, A. M., Lohse, M. & Usadel, B. Trimmomatic: a flexible trimmer for Illumina  
162 sequence data. *Bioinformatics* **30**, 2114–2120 (2014).

- 163 82. Langmead, B. & Salzberg, S. L. Fast gapped-read alignment with Bowtie 2. *Nat.*  
164 *Methods* **9**, 357–359 (2012).
- 165 83. Segata, N. et al. Metagenomic microbial community profiling using unique clade-  
166 specific marker genes. *Nat. Methods* **9**, 811–814 (2012).
- 167 84. Li, D., Liu, C.-M., Luo, R., Sadakane, K. & Lam, T.-W. MEGAHIT: an ultra-fast  
168 single-node solution for large and complex metagenomics assembly via succinct de  
169 Bruijn graph. *Bioinformatics* **31**, 1674–1676 (2015).
- 170 85. Seemann, T. Prokka: rapid prokaryotic genome annotation. *Bioinformatics* **30**, 2068–  
171 2069 (2014).
- 172 86. Huerta-Cepas, J. et al. Fast Genome-Wide Functional Annotation through Orthology  
173 Assignment by eggNOG-Mapper. *Mol. Biol. Evol.* **34**, 2115–2122 (2017).
- 174 87. Buchfink, B., Xie, C. & Huson, D. H. Fast and sensitive protein alignment using  
175 DIAMOND. *Nat. Methods* **12**, 59–60 (2015).
- 176 88. Huerta-Cepas, J. et al. eggNOG 5.0: a hierarchical, functionally and phylogenetically  
177 annotated orthology resource based on 5090 organisms and 2502 viruses. *Nucleic*  
178 *Acids Res.* **47**, D309–D314 (2019).
- 179 89. Ogata, H. et al. KEGG: Kyoto Encyclopedia of Genes and Genomes. *Nucleic Acids*  
180 *Res.* **27**, 29–34 (1999).
- 181 90. Tatusov, R. L. The COG database: a tool for genome-scale analysis of protein  
182 functions and evolution. *Nucleic Acids Res.* **28**, 33–36 (2000).
- 183 91. Yin, Y. et al. dbCAN: a web resource for automated carbohydrate-active enzyme  
184 annotation. *Nucleic Acids Res.* **40**, W445–W451 (2012).
- 185 92. Gibson, M. K., Forsberg, K. J. & Dantas, G. Improved annotation of antibiotic  
186 resistance determinants reveals microbial resistomes cluster by ecology. *ISME J.* **9**,  
187 207–216 (2015).
- 188 93. Parks, D. H., Tyson, G. W., Hugenholtz, P. & Beiko, R. G. STAMP: statistical  
189 analysis of taxonomic and functional profiles. *Bioinformatics* **30**, 3123–3124 (2014).
- 190 94. Paulson, J. N., Stine, O. C., Bravo, H. C., & Pop, M. Differential abundance analysis  
191 for microbial marker-gene surveys. *Nat. Methods* **10**, 1200–1202 (2013).

- 192 95. Ewels, P., Magnusson, M., Lundin, S. & Källér, M. MultiQC: summarize analysis  
193 results for multiple tools and samples in a single report. *Bioinformatics* **32**, 3047–  
194 3048 (2016).
- 195 96. Kim, D., Langmead, B. & Salzberg, S. L. HISAT: a fast spliced aligner with low  
196 memory requirements. *Nat. Methods* **12**, 357–360 (2015).
- 197 97. Li, H. et al. The Sequence Alignment/Map format and SAMtools. *Bioinformatics* **25**,  
198 2078–2079 (2009).
- 199 98. Patro, R., Duggal, G., Love, M. I., Irizarry, R. A. & Kingsford, C. Salmon provides  
200 fast and bias-aware quantification of transcript expression. *Nat. Methods* **14**, 417–419  
201 (2017).
- 202 99. Love, M. I., Huber, W. & Anders, S. Moderated estimation of fold change and  
203 dispersion for RNA-seq data with DESeq2. *Genome Biol.* **15**, 1–21 (2014).
- 204 100. Chen, T., Liu, Y. X., & Huang, L. ImageGP: An easy-to-use data visualization web  
205 server for scientific researchers. *iMeta* **1**, e5 (2022).

206

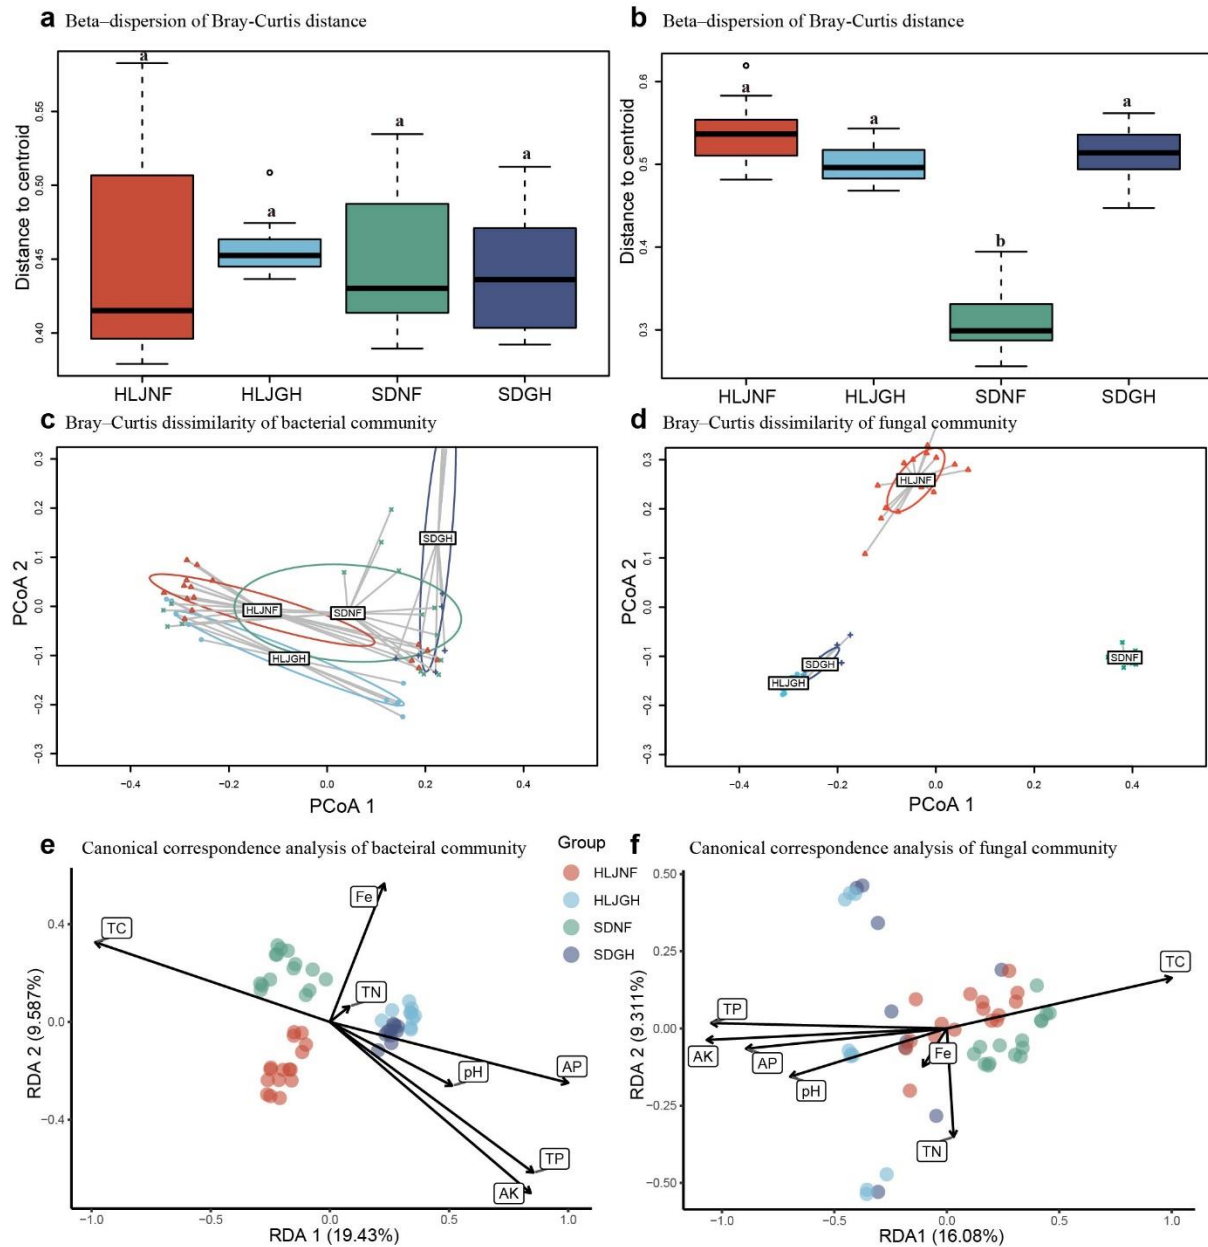

207

208 **Supplementary Fig. 1** Beta dispersion (distance to group centroid) of bacterial (a) and fungal

209 (b) communities among different field (HLJNF and SDNF) and greenhouse tomato groups

210 (HLJGH and SDGH) ( $P < 0.05$ , two-way ANOVA and Tukey HSD). In a-b, the central bars

211 represent median values, tops and bottoms of boxes represent the 75<sup>th</sup> and 25<sup>th</sup> percentiles; and

212 upper and lower whiskers extend to data no more than 1.5 times of the interquartile range from

213 the upper edge and lower edge of the box, respectively. Point value beyond this range is plotted

214 as individual points. (c-d), Principal coordinate analysis (PCoA) plots of bacterial (c) and

215 fungal (d) Bray-Curtis dissimilarity distance among different field and greenhouse tomato

216 groups in two provinces (Heilongjiang and Shandong provinces). (e-f), The RDA ordination

217 plot of significant soil physicochemical properties associated with bacterial communities (e)

218 and fungal communities (f) in field and greenhouse tomato groups. The number of samples per



219 group is as follows: HLJNF (n = 16 biologically independent plants), HLJGH (n = 10  
220 biologically independent plants), SDFN, (n = 15 biologically independent plants), and SDGH  
221 (n = 10 biologically independent plants). Vectors show fitted values of soil physicochemical  
222 properties significantly correlated within ordination space. The correlations between the soil  
223 physicochemical properties and RDA axes are represented by the length and angle of the  
224 arrows. HLJNF, the NF rhizosphere of Heilongjiang province (red color); HLJGH, the GH  
225 rhizosphere of Heilongjiang province (cyan color); SDFN, the NF rhizosphere of Shandong  
226 province (green color); SDGH, the GH rhizosphere of Shandong province (blue color).

227

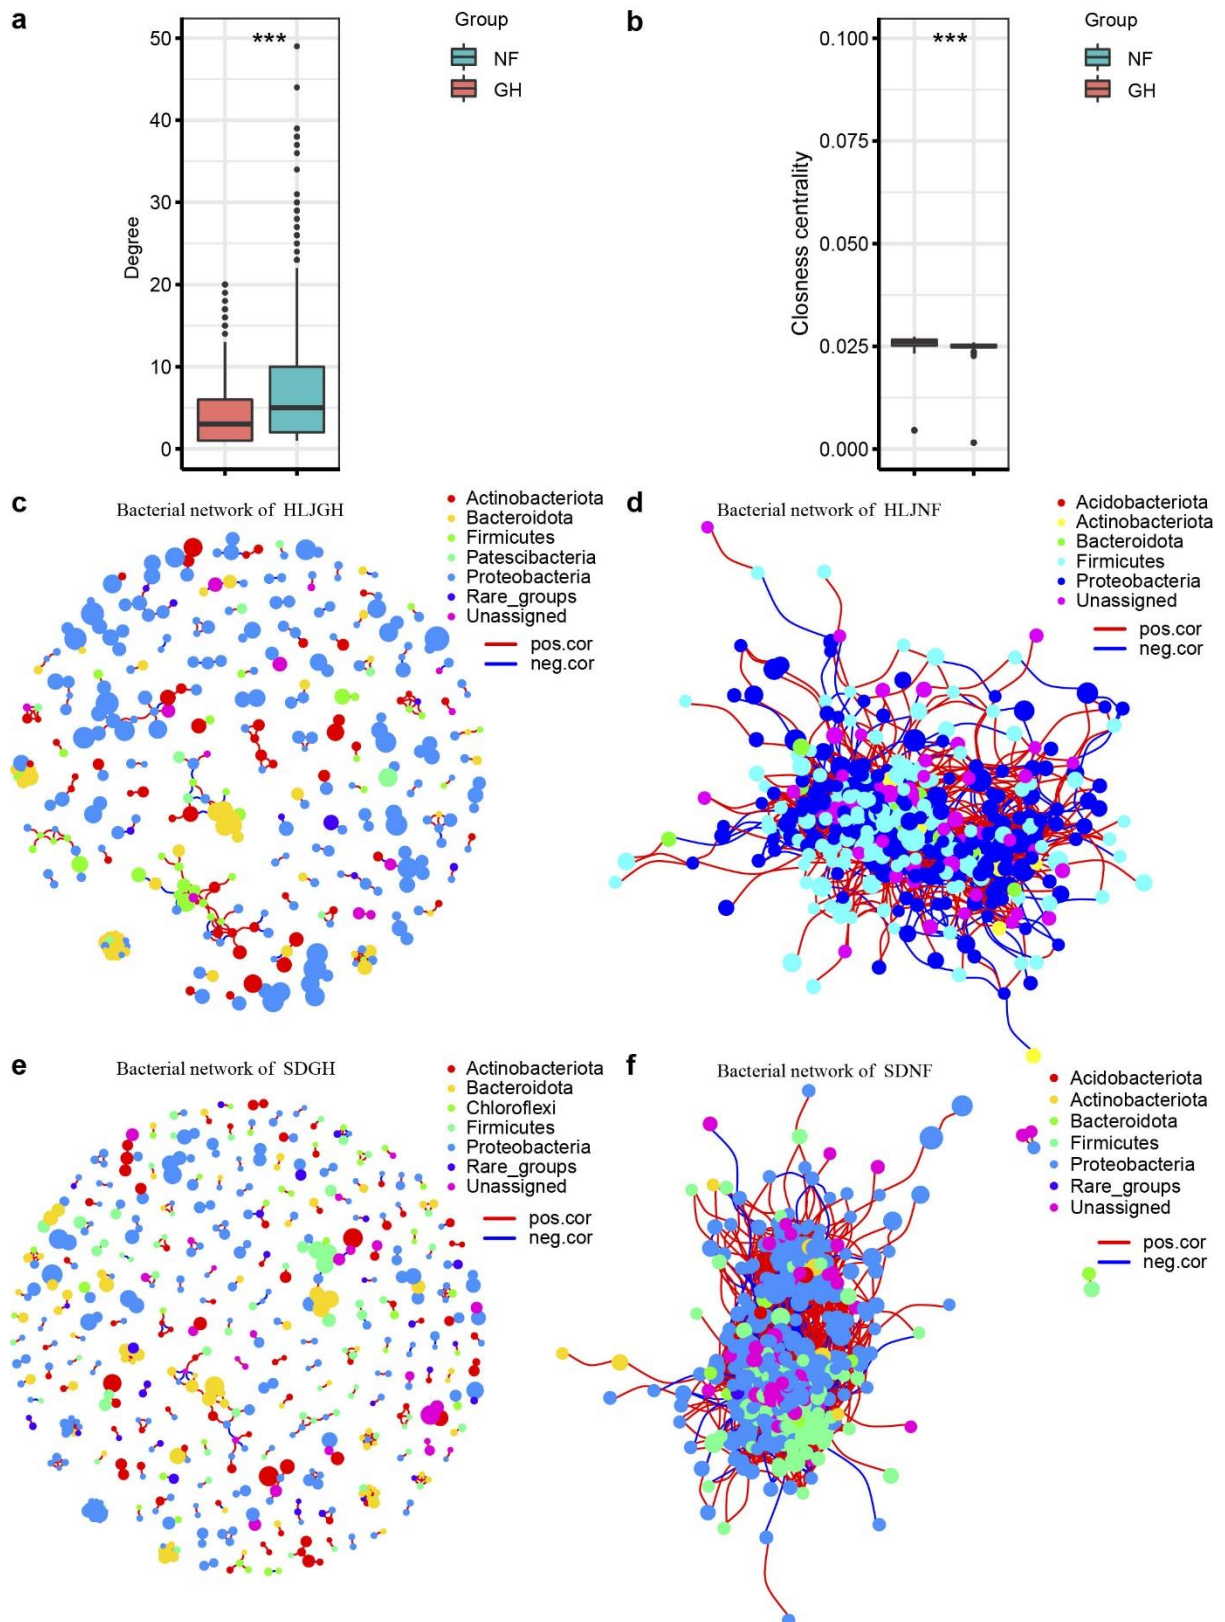

228

229 **Supplementary Fig. 2** Visualization of the co-occurrence networks of bacteria from tomato  
 230 groups of field-grown (NF) and greenhouse-grown (GH) tomato plants. Degree (**a**) and  
 231 closeness centrality (**b**) of bacterial co-occurrence networks were significantly higher than  
 232 those of GH tomato plants for both bacteria ( $P < 0.001$ , Wilcoxon–Wilcox test). NF (n = 31

233 biologically independent plants), GH (n = 20 biologically independent plants). (c) Co-  
234 occurrence networks of bacterial communities of HLJGH tomato. (d) Co-occurrence networks  
235 of bacterial communities of HLJNF tomato. (e) Co-occurrence networks of bacterial  
236 communities of SDGH tomato. (f) Co-occurrence networks of bacterial communities of SDGH  
237 tomato. Nodes represent individual zOTUs, with the bacterial phyla indicated by different  
238 colors. Links between nodes indicate significant correlations between zOTUs.  
239

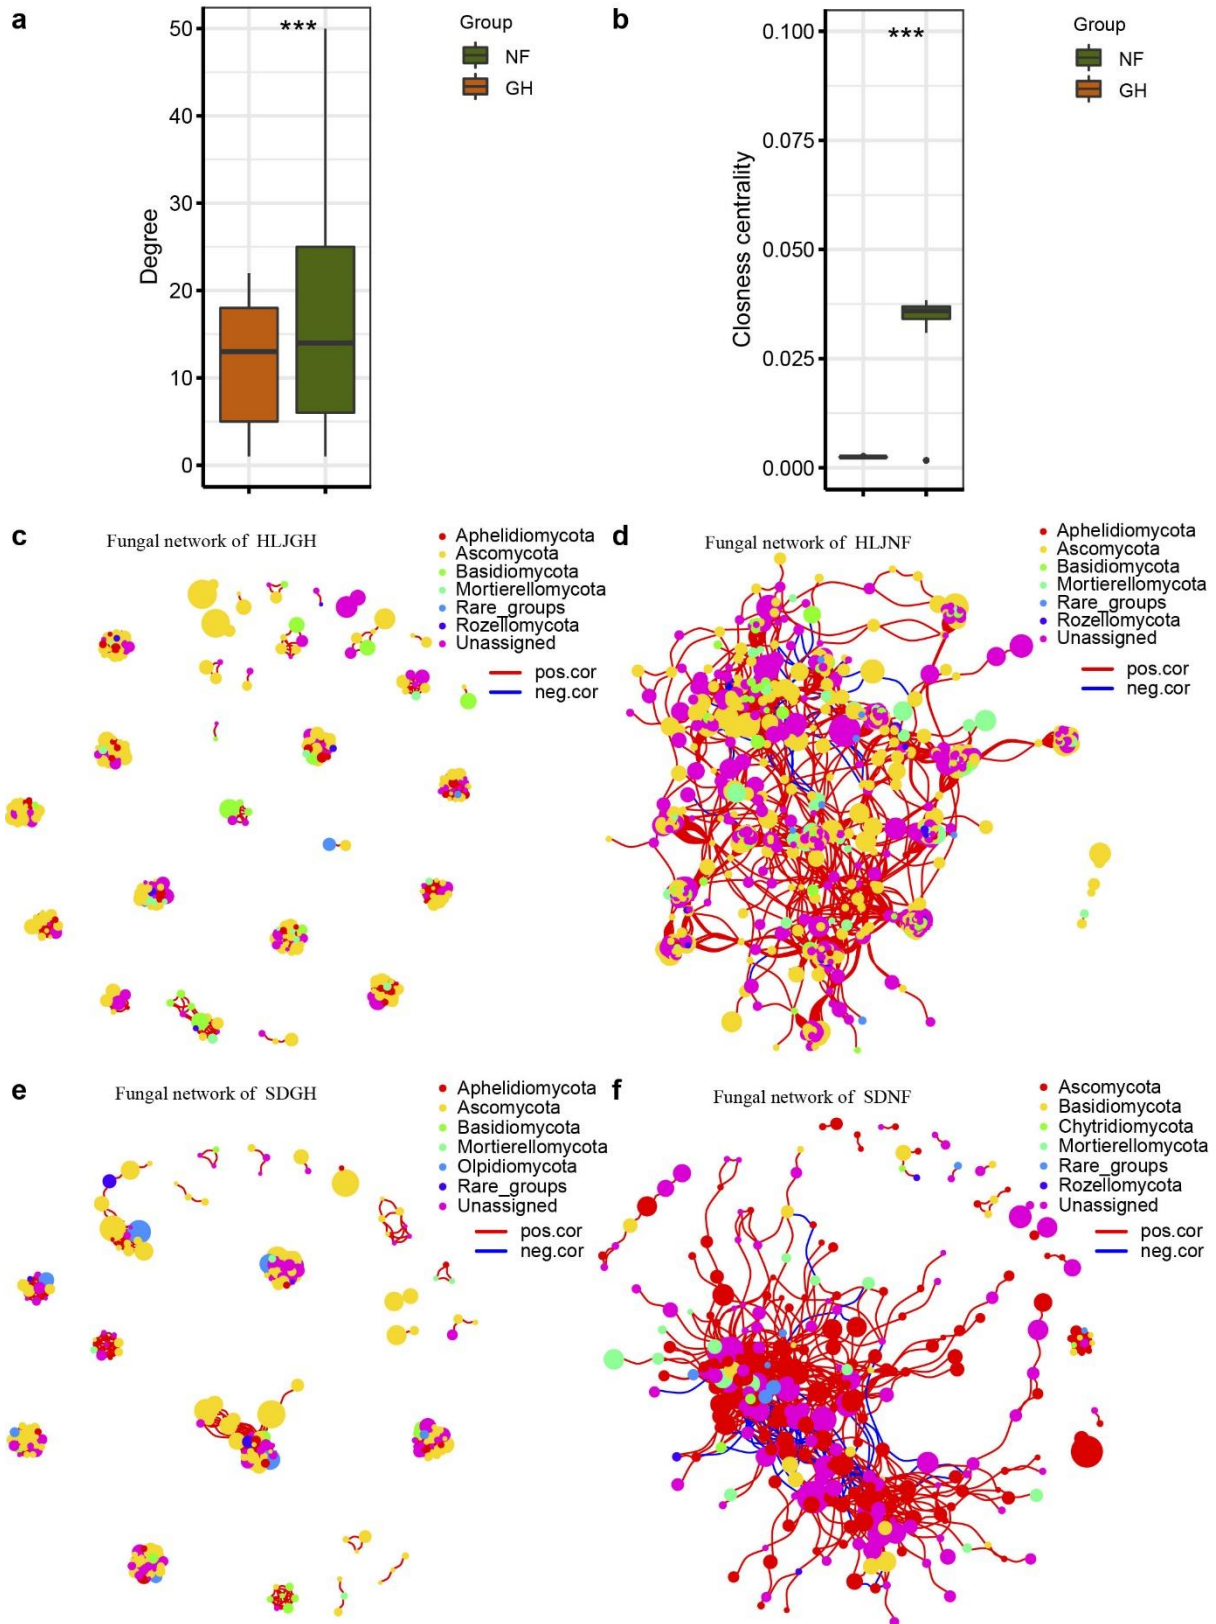

240

241 **Supplementary Fig. 3** Visualization of the co-occurrence networks of fungi from tomato  
 242 groups of field-grown (NF) and greenhouse-grown (GH) tomato plants. Degree (a) and  
 243 closeness centrality (b) of fungal co-occurrence networks in NF and GH tomato plants were  
 244 significantly higher than those of GH tomato plants for both bacteria ( $P < 0.001$ , Wilcoxon–

245 Wilcoxon test) (n = 31 biologically independent plants), GH (n = 20 biologically independent  
246 plants). (c) Co-occurrence networks of fungal communities of HLJGH tomato. (d) Co-  
247 occurrence networks of fungal communities of HLJNF tomato. (e) Co-occurrence networks of  
248 fungal communities of SDGH tomato. (f) Co-occurrence networks of fungal communities of  
249 SDGH tomato. Nodes represent individual zOTUs, with the fungal phyla indicated by different  
250 colors. Links between nodes indicate significant correlations between zOTUs.  
251

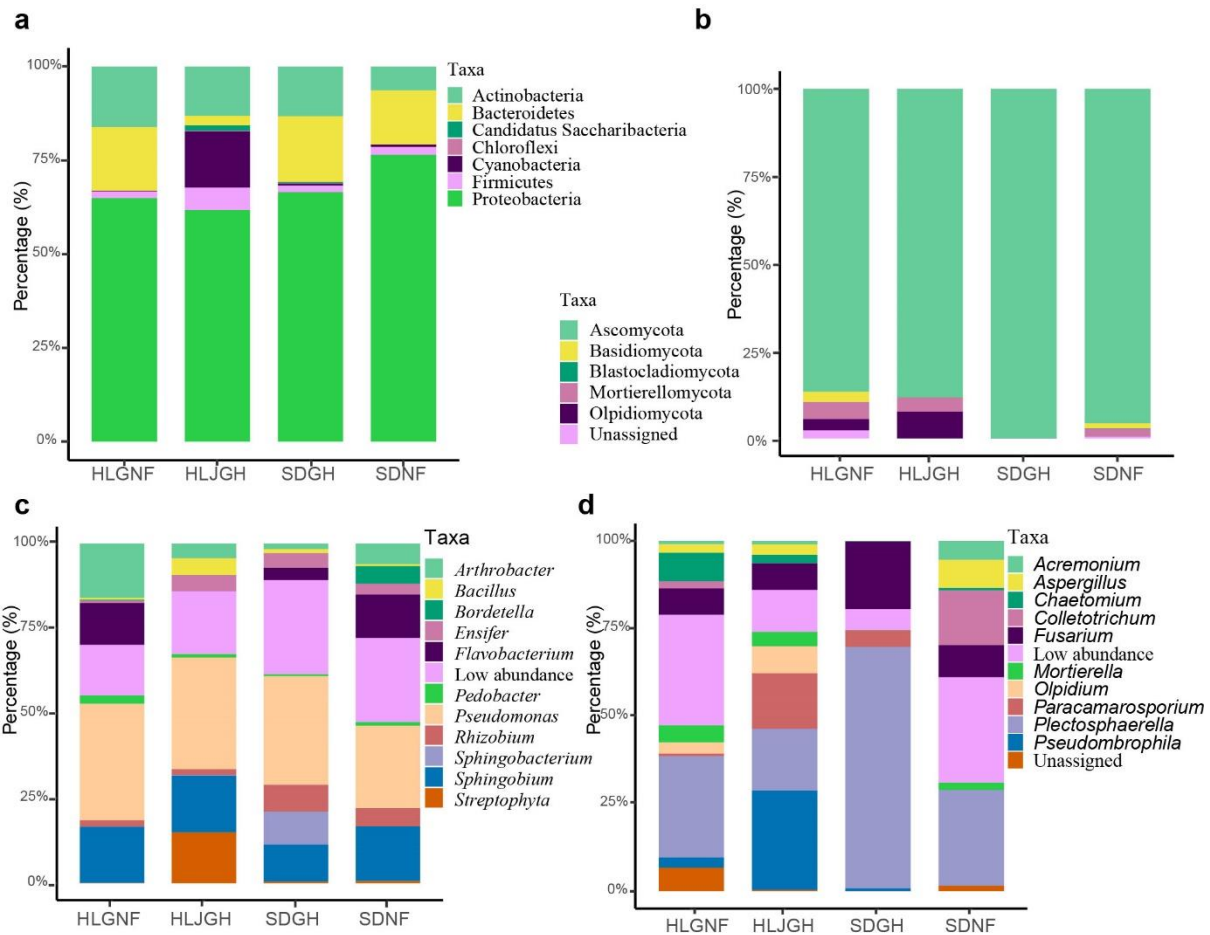

252

253 **Supplementary Fig. 4** The relative abundance of bacteria and fungi at phylum and genus levels.

254 The relative abundance of dominant bacterial taxa (a) and fungal taxa (b) in different field and

255 greenhouse groups at phylum level. Relative abundance of dominant bacterial genus (c) and

256 fungal genus (d) in different field and greenhouse tomato groups. HLJNF, the NF rhizosphere

257 of Heilongjiang province; HLJGH, the GH rhizosphere of Heilongjiang province; SDNF, the

258 NF rhizosphere of Shandong province; SDGH, the GH rhizosphere of Shandong province.

259

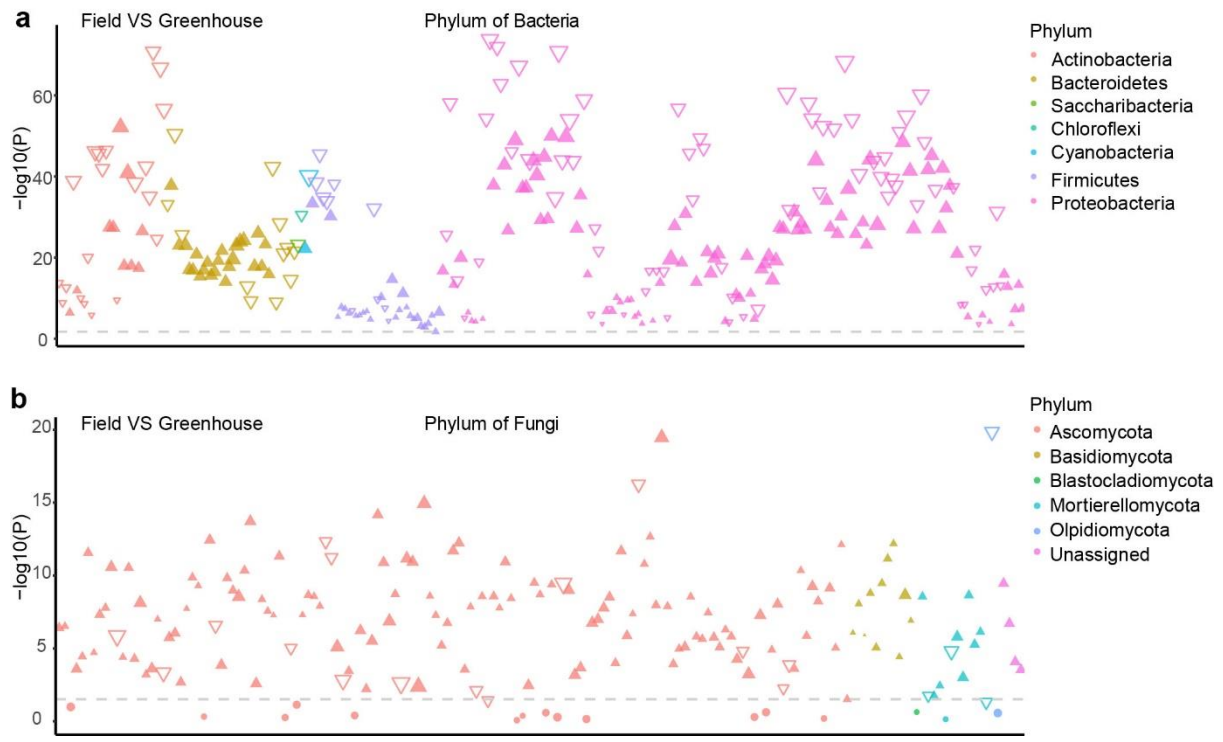

260  
 261  
 262  
 263  
 264  
 265  
 266

**Supplementary Fig. 5** The significantly enriched bacterial and fungal taxa of field and greenhouse environments, revealed by edgeR. Manhattan plots presenting significantly enriched and depleted bacterial taxa (a) and fungal taxa (b) in NF tomato compared with those in GH tomato groups in both provinces (FDR adjusted  $P < 0.05$ , two-sided Wilcoxon rank sum test).

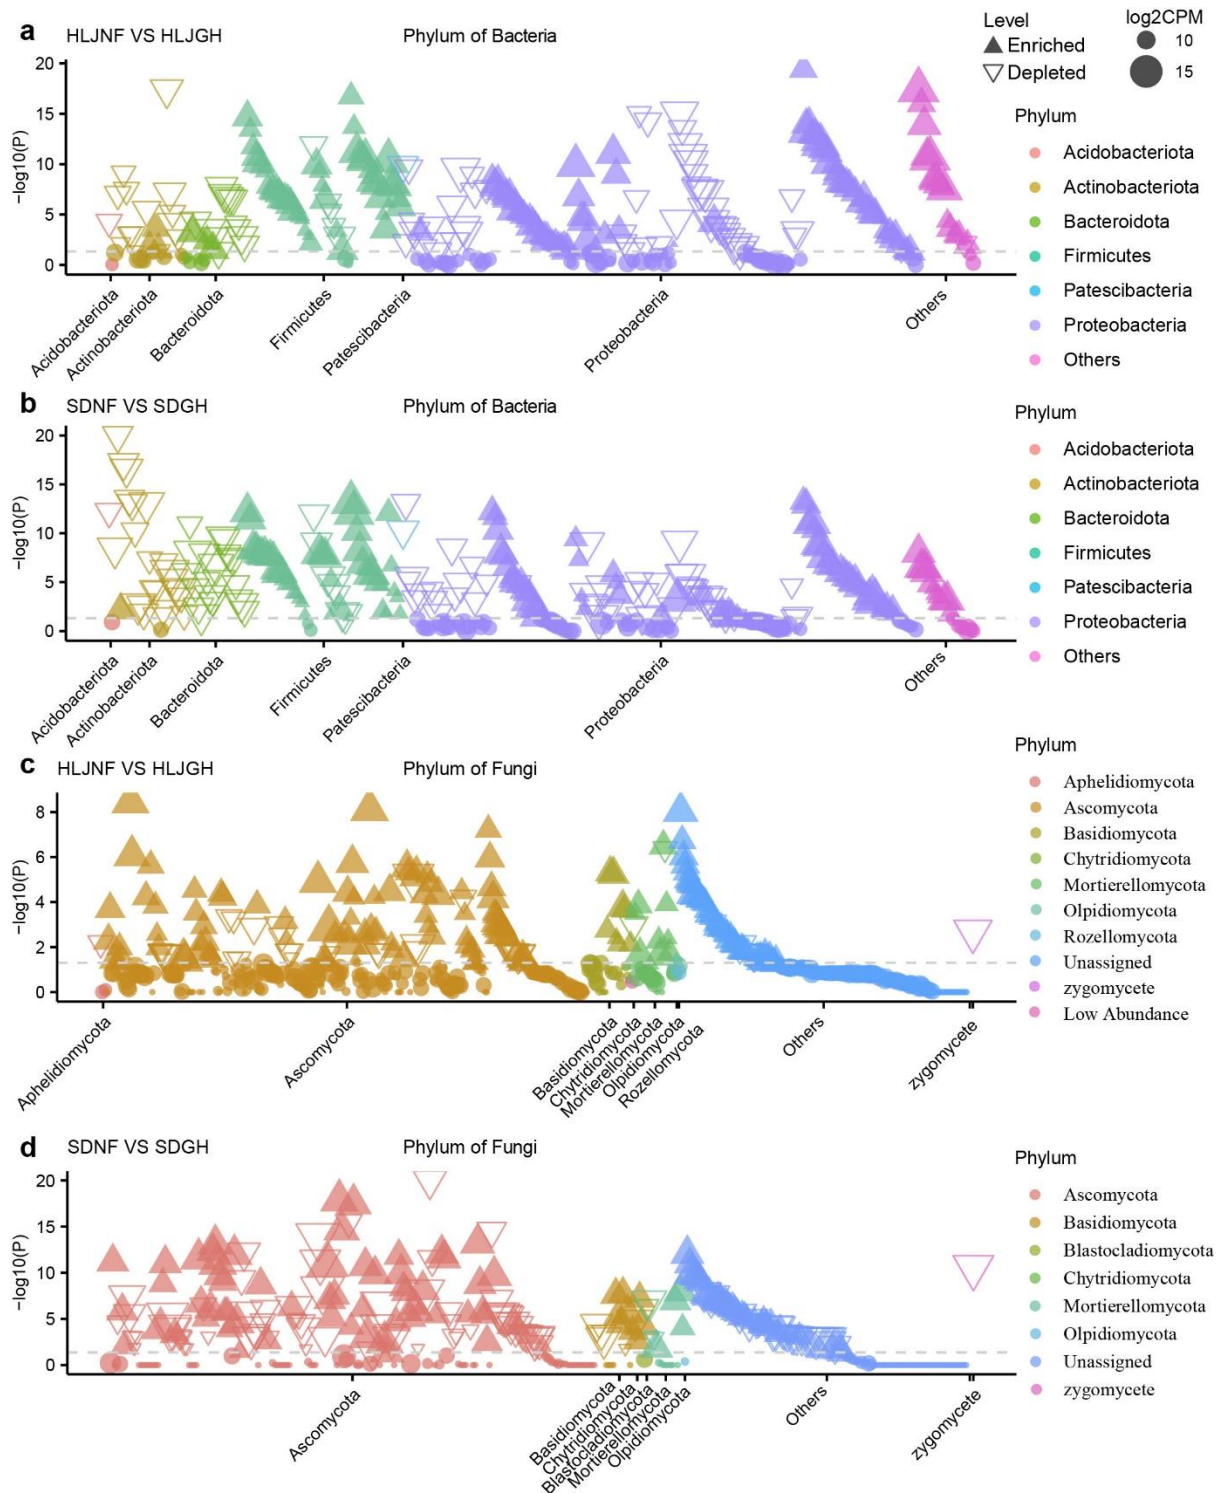

267

268 **Supplementary Fig. 6** Manhattan plots presenting significantly enriched and depleted

269 bacterial taxa in HLJNF tomato (**a**) and tomato SDNF (**b**) compared with those in HLJGH

270 tomato and SDGH tomato respectively. Manhattan plots present significantly enriched and

271 depleted fungal taxa in HLJNF tomato (**c**) and tomato SDNF (**d**) compared with those in

272 HLJGH tomato and SDGH tomato respectively (FDR adjusted  $P < 0.05$ , two-sided Wilcoxon

273 rank sum test).





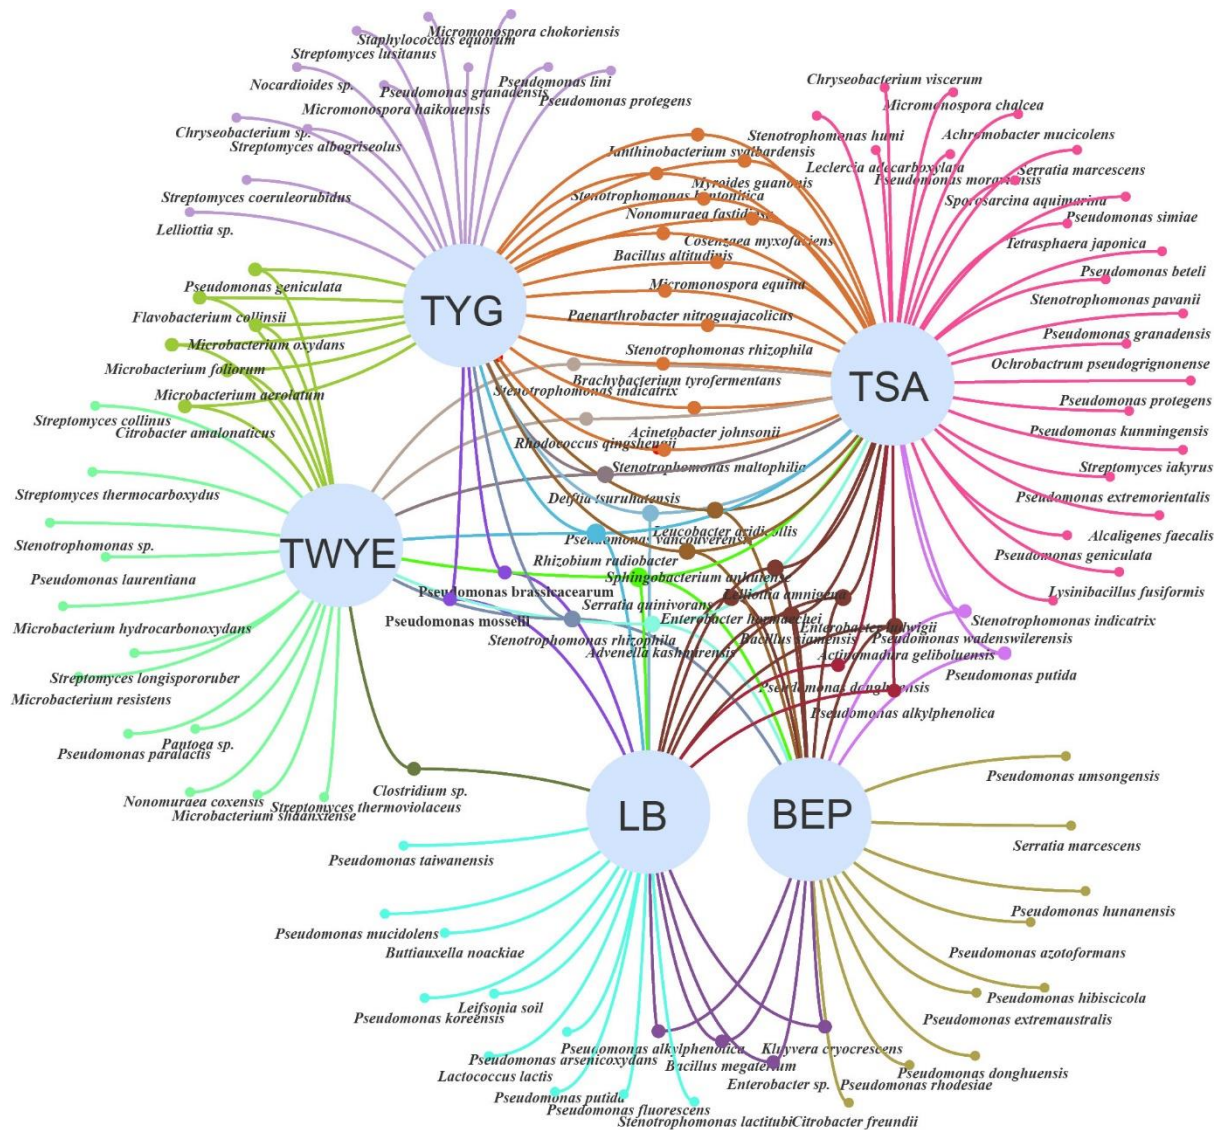

275

276 **Supplementary Fig. 7** The Venn network plot presents shared and unique bacterial species

277 isolated from five different culture media. BEP, Beef extract peptone; LB, Luria–Bertani;

278 TSA, Tryptic Soy Agar; TWYE, Tap Water Yeast Extract; TYG, Tryptone Yeast extract

279 Glucose Medium.

280

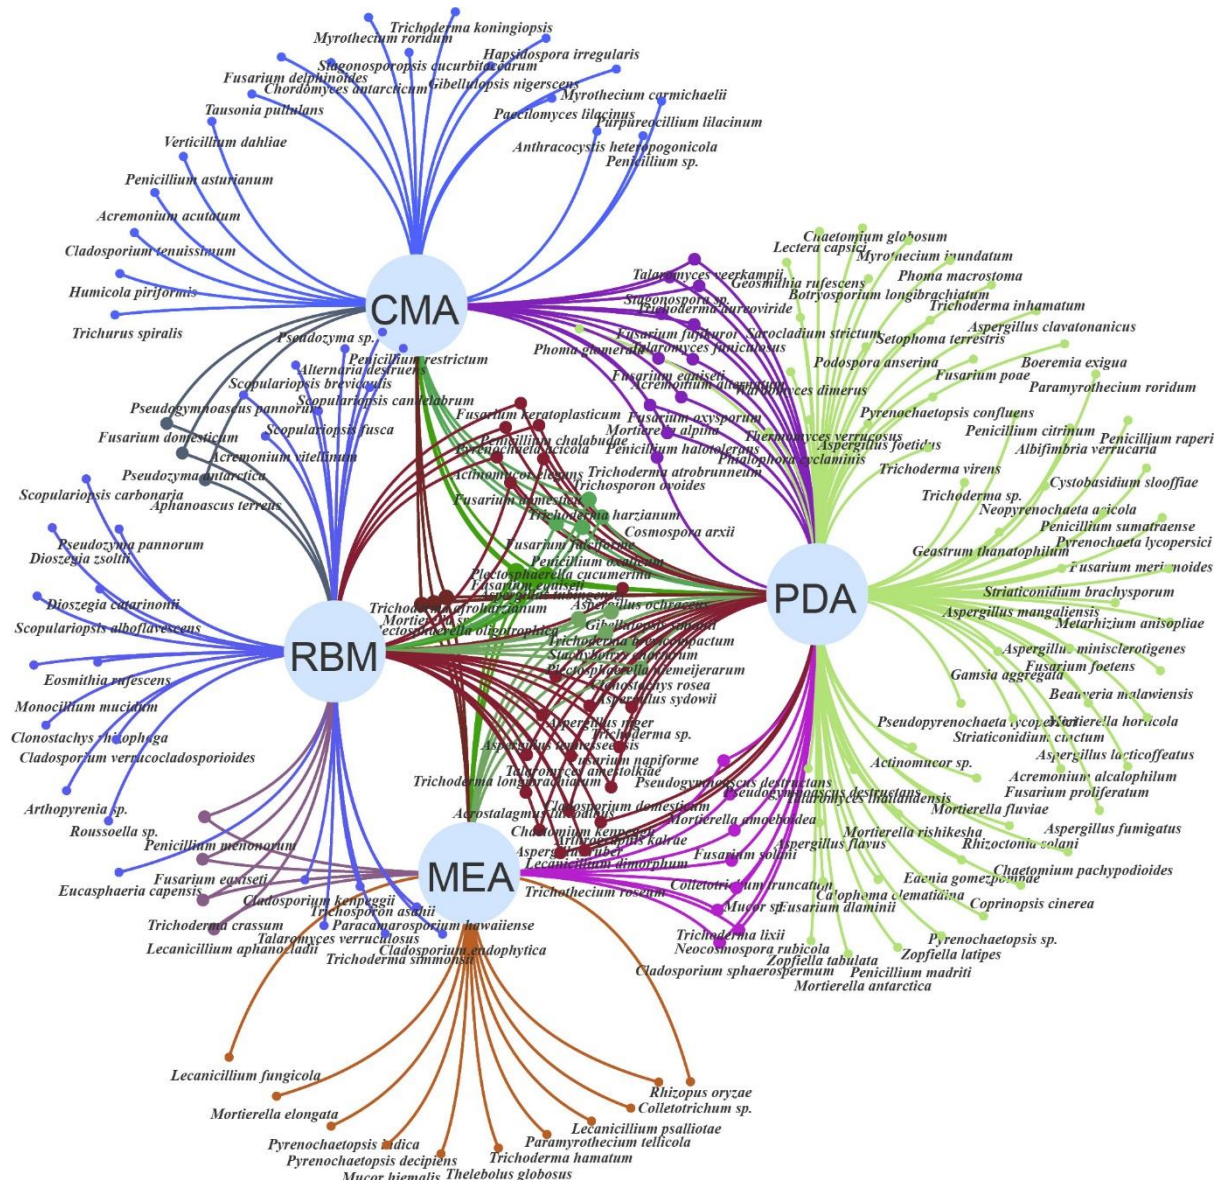

284 **Supplementary Fig. 8** The Veen network plot presents shared and unique fungal species  
 285 isolated from five different culture media. CMA, corn meal agar; PDA, Potato Dextrose  
 286 Agar; RBM, Rose Bengal Medium; MEA, Malt Extract Agar.

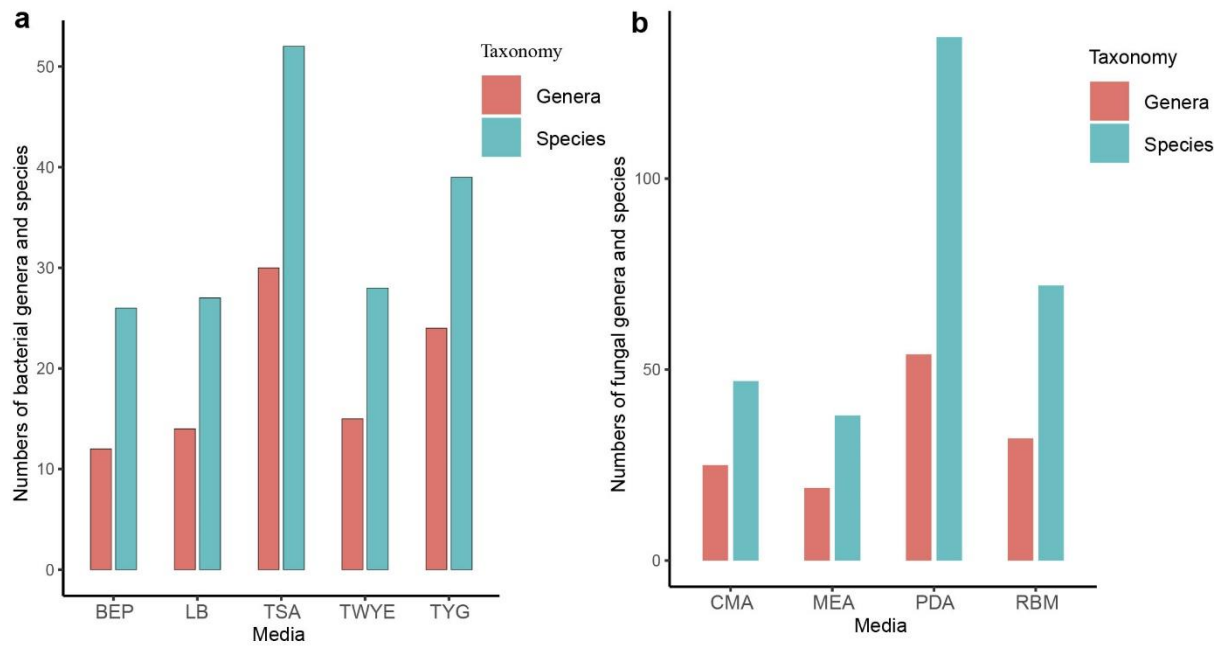

288

289 **Supplementary Fig. 9** The recovery of bacteria (a) and fungi (b) at species and genus levels  
 290 from different culture media were summarized.

291

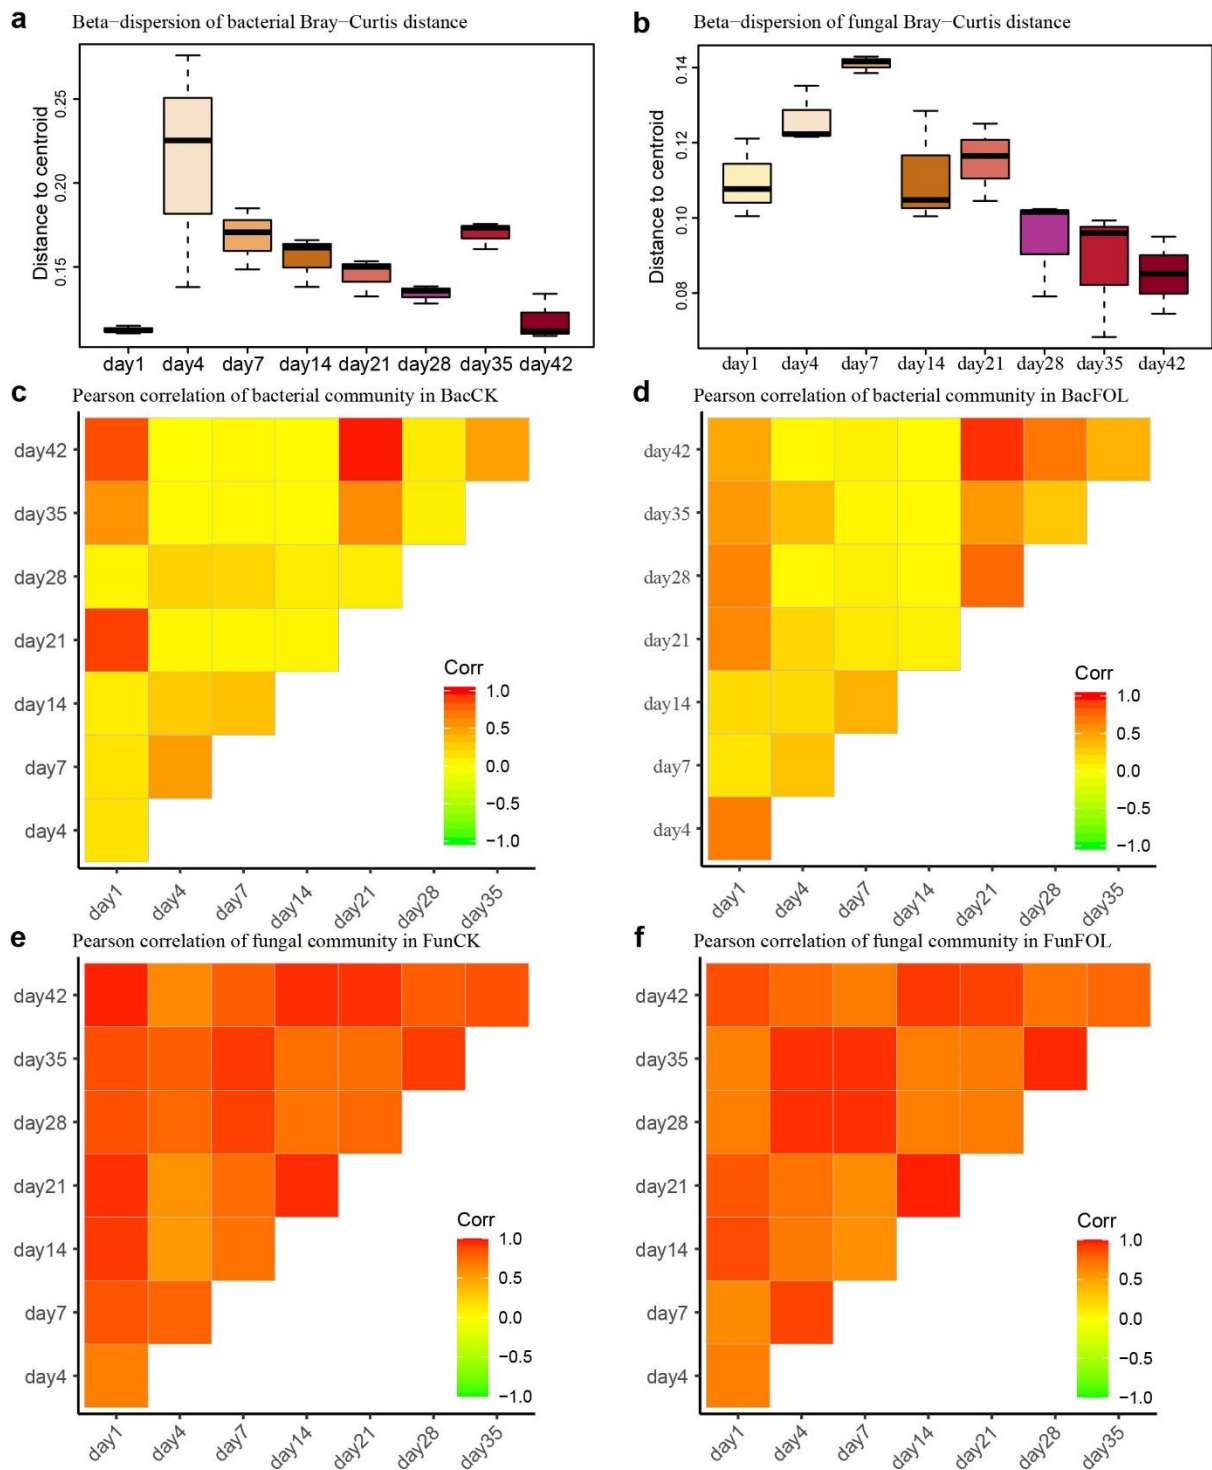

292

293 **Supplementary Fig. 10** Beta dispersion (distance to group centroid) of bacterial communities  
 294 (n =3 biologically independent plants) **(a)** and fungal communities (n =3 biologically  
 295 independent plants) **(b)** among different time points of CrossKFOL SynComs. The central bars  
 296 represent median values, tops and bottoms of boxes represent the 75th and 25th percentiles,  
 297 and upper and lower whiskers extend to data no more than 1.5 times the interquartile range  
 298 from the upper edge and lower edge of the box, respectively. Point value beyond this range is  
 299 plotted as individual point. The pairwise correlations between different time points in BacCK

300 (c), BacFOL (d) SynComs of bacterial communities, and FunCK (e), FunFOL (f) SynComs of  
301 fungal communities were reflected by Pearson's correlation coefficients. In c-f, the yellow  
302 color indicates the value of Pearson's correlation coefficients lower than 0.5, and the red color  
303 indicates the value of Pearson's correlation coefficients greater than 0.5.  
304

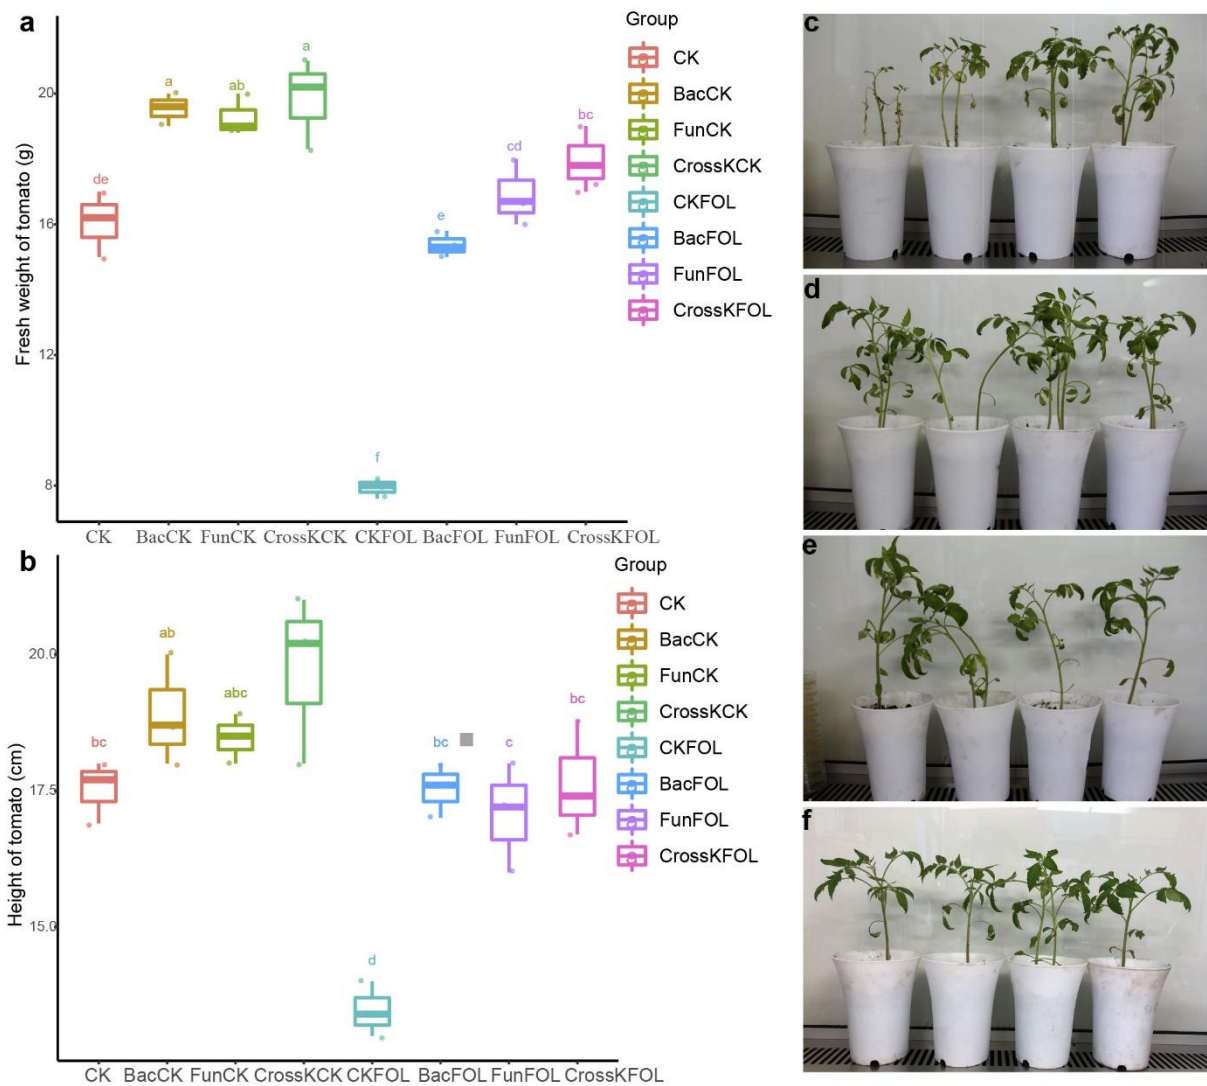

305

306

307

308

309

310

311

312

313

314

315

316

**Supplementary Fig. 11** Fresh weight (**a**) and height (**b**) of tomato plants inoculated with CK SynComs, BacCK SynComs, FunCK SynComs, CrossKCK SynComs, CKFOL SynComs, BacFOL SynComs, FunFOL SynComs, CrossKFOL SynComs, and grem-free plants (CK) treatment at the day of 42 ( $P < 0.05$ , one-way ANOVA and Tukey HSD,  $n = 3$  biologically independent plants). Representative images of grem-free tomato seedlings inoculated only with *FOL* (**c**) *FOL* together with Bac SynComs (**d**), *FOL* together with Fun SynComs (**e**) and *FOL* together with CrossK (bacteria and fungi) SynComs (**f**). In g-h, the central bars represent median values, tops and bottoms of boxes represent the 75<sup>th</sup> and 25<sup>th</sup> percentiles, and upper and lower whiskers extend to data no more than 1.5 times of the interquartile range from the upper edge and lower edge of the box, respectively.

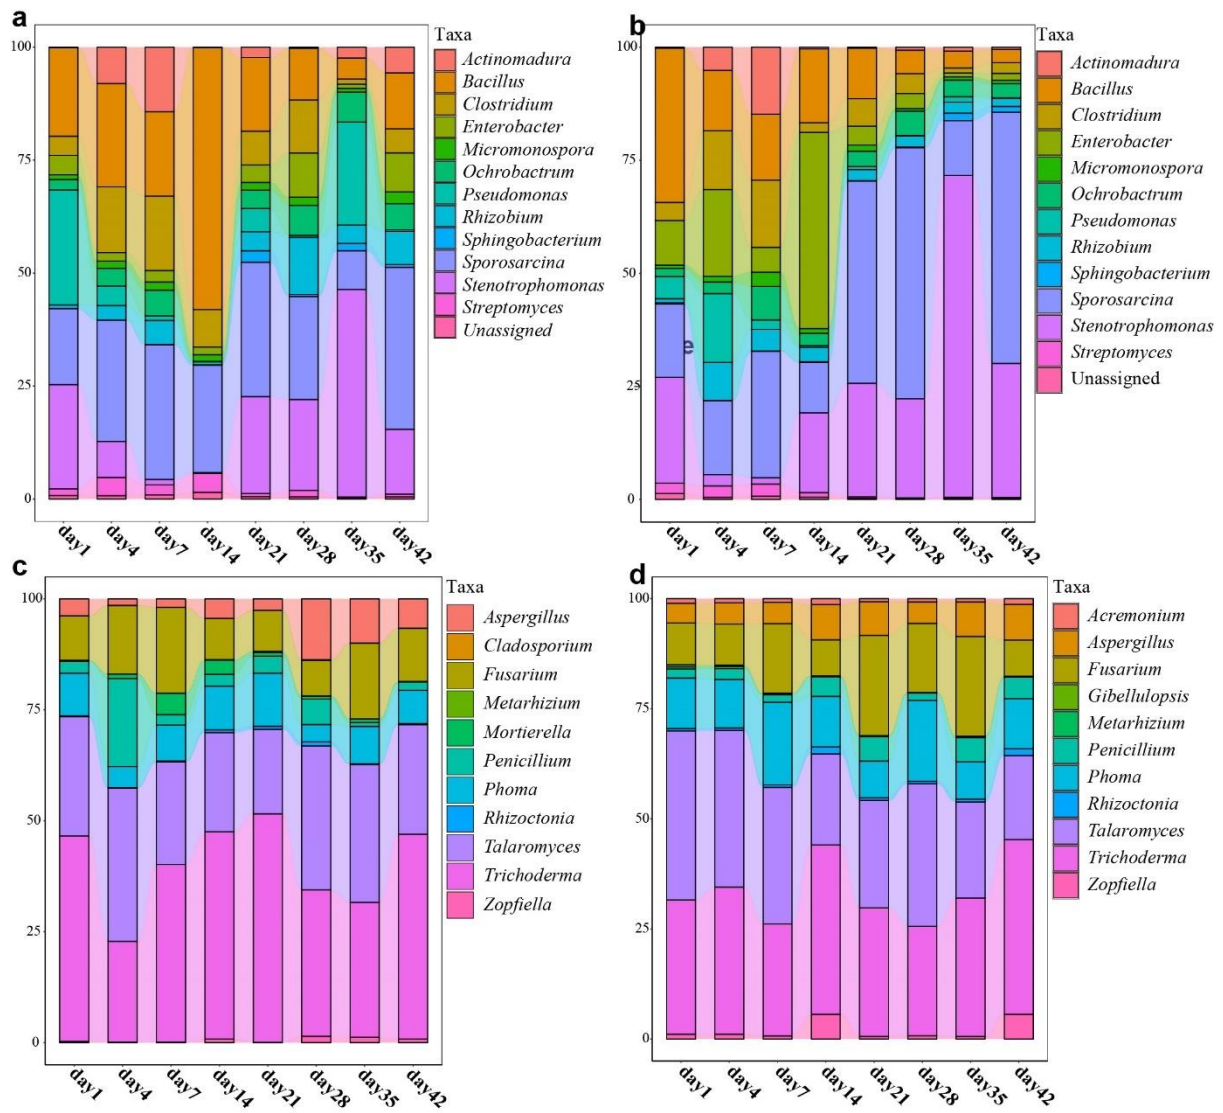

317

318 **Supplementary Fig. 12** Bacterial abundance in Bac (**a**) and CrossK (**b**) SynComs, at the genus

319 level, with the changes recorded at different growth time points. Fungal abundance in the Fun

320 (**c**) and CrossK (**d**) SynComs, at the genus level, with the changes recorded at different growth

321 time points.

322



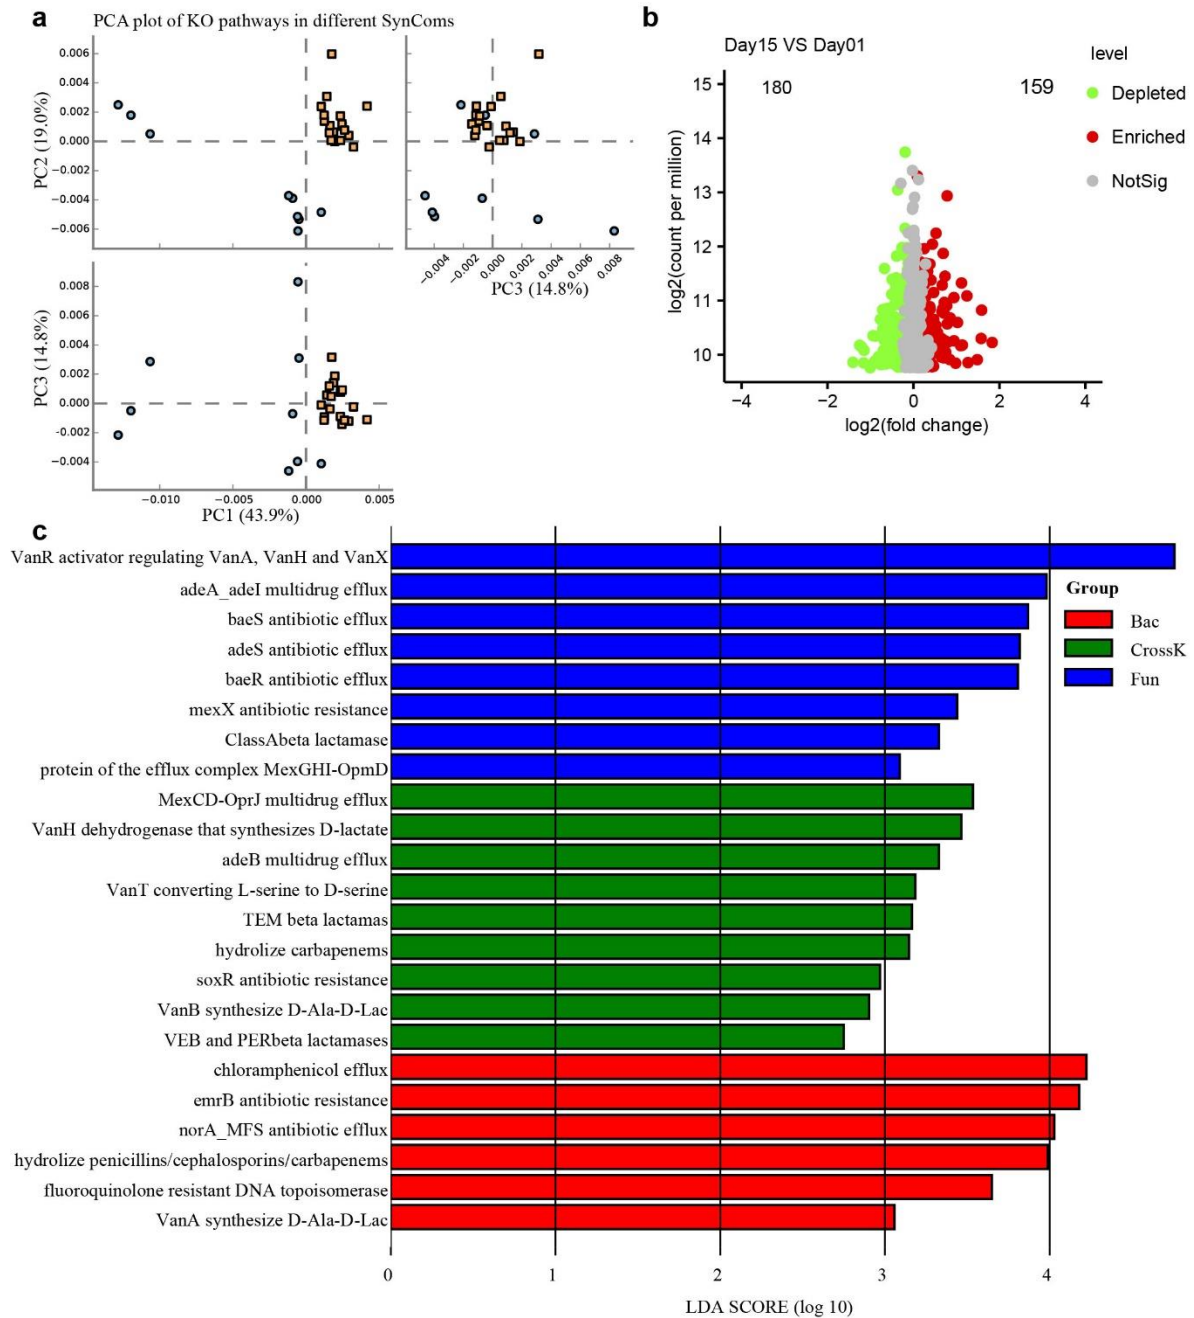

323

324 **Supplementary Fig. 13 (a)** PCA distance analysis of KO pathways in CrossK, Fun, and Bac  
 325 SynComs inoculated with *FOL*, the PC1, PC2, and PC3, showed that the KO pathways of day  
 326 1 cluster separately from those on day 14. Yellow dots indicate tomato metagenomic samples  
 327 of day 1 and blue dots indicate tomato metagenomic samples of day 14. **(b)** Volcano plots  
 328 presenting significantly enriched and depleted KEGG pathways of Day 15 compared with those  
 329 of Day 1 (FDR adjusted  $P < 0.05$ , two-sided Wilcoxon rank sum test). Red dots indicate  
 330 enriched KEGG pathways of day 15, green dots indicate enriched KEGG pathways of day 1,  
 331 and gray dots indicate non-significant KEGG pathways. **(c)** Indicator pathways with LDA

332 scores of 2 or greater in ResFam pathways associated with SynComs groups (red, Bac  
333 SynComs; green, CrossK SynComs; blue, Fun SynComs).

334
